# Supplementary material for: Nonalcoholic Fatty Liver Disease Is Associated With Left Ventricular Diastolic Dysfunction in Patients With Type 2 Diabetes
Source: PubMed Central journal article supplement — Diabetes Care. 2012 Jan 16;35(2):389–95. doi: 10.2337/dc11-1820 (PMC3263884; doi:10.2337/dc11-1820), 2012-01-16
Supplement: supp_dc11-1820v111820_DC111820SupplementaryData.pdf [file supp_dc11-1820v111820_DC111820SupplementaryData.pdf]

SUPPLEMENTARY DATA

**Supplementary Table 1.** Echocardiographic and hemodynamic characteristics of type 2 diabetic patients grouped by ultrasonographic severity of NAFLD.

|                                            | Without steatosis (n=18) | Mild NAFLD (n=7) | Moderate NAFLD (n=11) | Severe NAFLD (n=14) | P-value for trends | P-value adjusted for HbA <sub>1c</sub> , triglycerides, and hypertension status* |
|--------------------------------------------|--------------------------|------------------|-----------------------|---------------------|--------------------|----------------------------------------------------------------------------------|
| EDV, mL                                    | 84.1±11                  | 86.5±10          | 88.2±12               | 81.8±8              | 0.39               | NS                                                                               |
| ESV, mL                                    | 24.0±6.1                 | 20.4±6           | 24.7±10               | 21.9±6              | 0.58               | NS                                                                               |
| LV-EF, %                                   | 71.3±6.9                 | 76.7±7           | 72.7±9                | 73.1±6              | 0.49               | NS                                                                               |
| LV mass index, g/m <sup>2</sup>            | 107.9±14.9               | 104.8±11         | 104.3±21              | 119.3±14            | 0.09               | NS                                                                               |
| LA maximal volume index, mL/m <sup>2</sup> | 24.8±5.8                 | 21.3±4           | 26.9±10               | 29.8±11             | 0.27               | NS                                                                               |
| E, m/s                                     | 0.57±0.16                | 0.63±0.11        | 0.61±0.10             | 0.67±0.19           | 0.15               | NS                                                                               |
| A, m/s                                     | 0.84±0.16                | 0.86±0.10        | 0.89±0.14             | 0.91±0.14           | 0.36               | NS                                                                               |
| E/A ratio                                  | 0.68±0.13                | 0.73±0.10        | 0.70±0.10             | 0.74±0.11           | 0.34               | NS                                                                               |
| Dte, ms                                    | 253.4±56                 | 285.2±57         | 286.3±87              | 279.4±82            | 0.72               | NS                                                                               |
| s' velocity, cm/s                          | 10.5±1.9                 | 10.3±1.2         | 9.9±1.1               | 8.9±1.3             | <0.05              | <0.05                                                                            |
| a' velocity, cm/s                          | 12.6±2.1                 | 12.8±2.0         | 12.7±2.2              | 10.9±1.8            | 0.09               | NS                                                                               |
| e' velocity, cm/s                          | 9.9±1.9                  | 9.6±1.7          | 8.5±1.1               | 7.5±1.4             | <0.001             | <0.01                                                                            |
| E/e' ratio                                 | 5.59±1.1                 | 6.61±0.5         | 7.20±0.6              | 9.1±1.2             | <0.0001            | <0.0001                                                                          |
| IVRT, ms                                   | 87.3±13                  | 90.8±16          | 98.2±17               | 92.4±16             | 0.36               | NS                                                                               |
| IVRT/T <sub>E-e'</sub>                     | 2.27±1.0                 | 3.30±1.3         | 2.13±0.7              | 1.21±1.1            | <0.01              | <0.01                                                                            |
| Tau, ms                                    | 33.2±13                  | 34.1±11          | 41.6±6                | 48.1±10             | <0.01              | <0.05                                                                            |
| LV-EDP, mmHg                               | 15.1±1.0                 | 15.3±1.5         | 16.2±0.5              | 17.3±0.7            | <0.0001            | <0.0001                                                                          |
| LV-EDP/EDV, mmHg/mL                        | 0.18±0.02                | 0.19±0.02        | 0.19±0.02             | 0.22±0.03           | <0.01              | <0.05                                                                            |
| Ea, mmHg/mL                                | 1.03±0.29                | 0.96±0.3         | 0.90±0.2              | 1.03±0.2            | 0.49               | NS                                                                               |
| SAC, mL/mmHg                               | 1.57±0.4                 | 1.57±0.3         | 1.55±0.3              | 1.35±0.3            | 0.20               | NS                                                                               |
| SVR index, dyne/s/cm <sup>5</sup>          | 2385±420                 | 1830±989         | 2258±490              | 2870±449            | 0.13               | NS                                                                               |
| LS <sub>sys</sub> , %                      | -16.1±2.9                | -14.1±2          | -15.9±3               | -16.1±3             | 0.87               | NS                                                                               |
| SR <sub>sys</sub> , s <sup>-1</sup>        | -1.03±0.15               | -0.90±0.11       | -1.07±0.13            | -1.01±0.12          | 0.40               | NS                                                                               |
| SR <sub>E</sub> , s <sup>-1</sup>          | 0.94±0.20                | 0.87±0.10        | 0.97±0.19             | 0.83±0.22           | 0.28               | NS                                                                               |
| SR <sub>L</sub> , s <sup>-1</sup>          | 1.0±0.18                 | 0.92±0.21        | 0.90±0.27             | 0.93±0.25           | 0.32               | NS                                                                               |
| E/SR <sub>E</sub> , m                      | 0.63±0.19                | 0.80±0.11        | 0.68±0.19             | 0.84±0.21           | 0.01               | <0.05                                                                            |
| 24-hour HRV by SDNN, ms                    | 127±23                   | 112±42           | 133±24                | 134±36              | 0.44               | NS                                                                               |
| 24-hour HRV by r-MSSD, ms                  | 28.8±15.7                | 36.0±24          | 37.1±13               | 37.3±24             | 0.59               | NS                                                                               |
| 24-hour HRV by p-NN50, %                   | 2.57±2.5                 | 3.91±4           | 5.13±4                | 4.75±4              | 0.28               | NS                                                                               |

Data are expressed as means±SD. Measurements of LV global longitudinal strain and strain rate were available in 45 patients (29 with NAFLD and 16 without steatosis). NS, not significant. \* P values for differences were determined by means of analysis of covariance (ANCOVA).
